# Supplementary material for: In Silico Development and Structural Evaluation of a Broad-Spectrum Chimeric Multi-Epitope Vaccine against Co-Infection by Human Metapneumovirus, Respiratory Syncytial Virus, and Influenza A Virus
Source: Research Square preprint supplement (doi:10.21203/rs.3.rs-7697013/v1), 2025-10-14
Supplement: Supplementary file 1 [file 3d503fc91f37a1622ee993d8.docx]

**In Silico Development and Structural Evaluation of a Broad-Spectrum Chimeric Multi-Epitope Vaccine against Co-Infection by Human Metapneumovirus, Respiratory Syncytial Virus, and Influenza A Virus**

Lu Li1, #, Yong Chen2, #, Chunyan Wu1, Junhong Xie1, Abdullah Shah3, Xin Xie1, Junyin Tan1, Yudie Qin1, Yuanlei Zeng1, Amin Ullah Jan4,*, Tianci Yang5,*, and Sadeeq Ullah1, *

1 Guangdong Provincial Key Laboratory of Medical Immunology and Molecular Diagnostics, The Second Affiliated Hospital, School of Medical Technology, Guangdong Medical University, Dongguan 523808, China

2 Department of Medical Laboratory, Affiliated Cancer Hospital of Chengdu Medical College, Chengdu Seventh People's Hospital, Chengdu 610231, China

3 Faculty of Bio Sciences, Department of Biochemistry, University of Veterinary and Animal sciences Swat (UVAS-Swat), Swat 01923, Pakistan

4 Department of Biotechnology, Shaheed Benazir Bhutto University Sheringal Dir Upper, Sheringal 18300, Pakistan

5 Institute of Infectious Disease, School of Medicine, Xiamen University, Xiamen 361102, China

**# These authors contributed equally to this work.**

*** Correspondence:**

Sadeeq Ullah, [anjum_sadiq@yahoo.com](mailto:anjum_sadiq@yahoo.com)

Amin Ullah Jan, [aminjan@sbbu.edu.pk](mailto:aminjan@sbbu.edu.pk)

Tianci Yang, [yangtianci@xmu.edu.cn](mailto:yangtianci@xmu.edu.cn)

**Supplementary figures:**

**
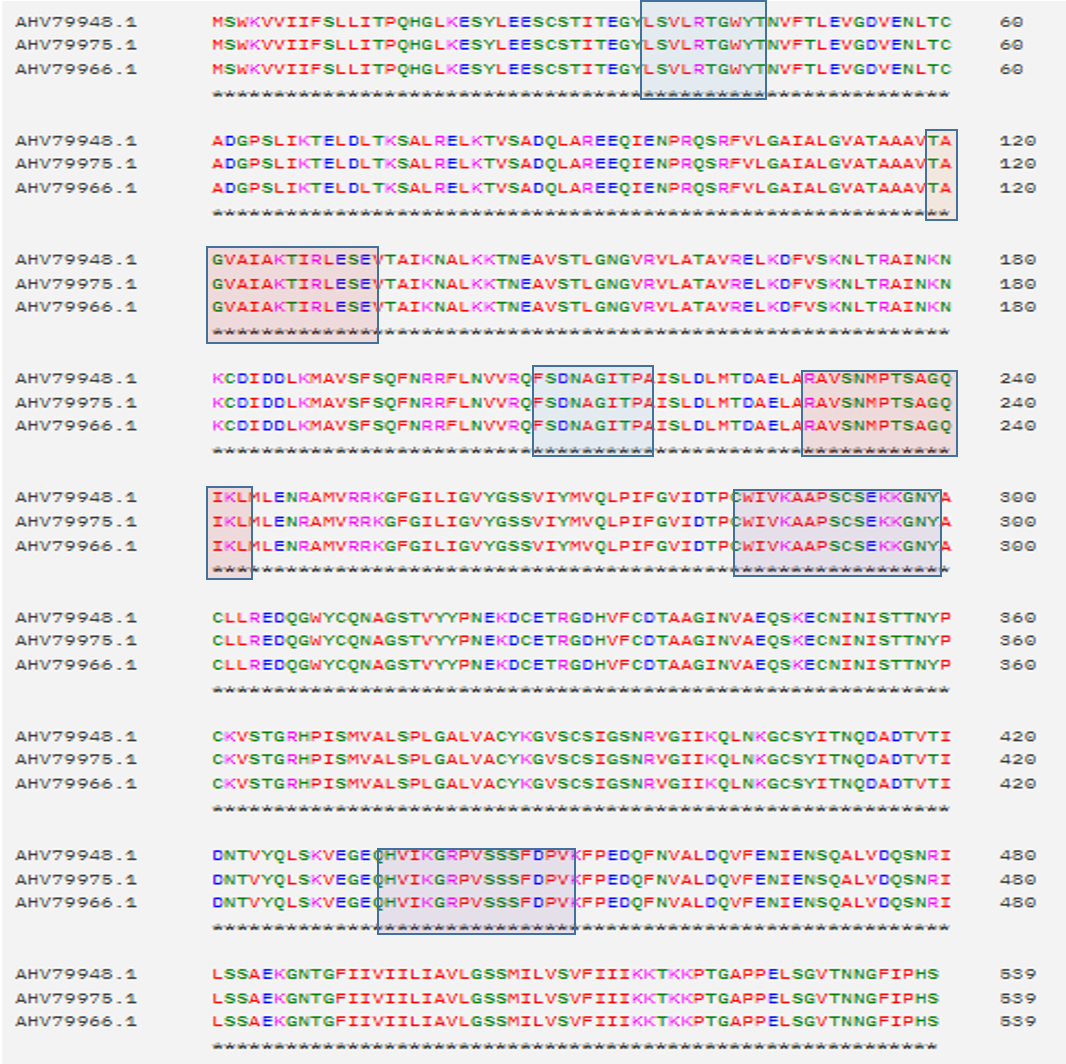
**

Figure S1: Shows the CTL, HTL and BCL epitopes in h

**
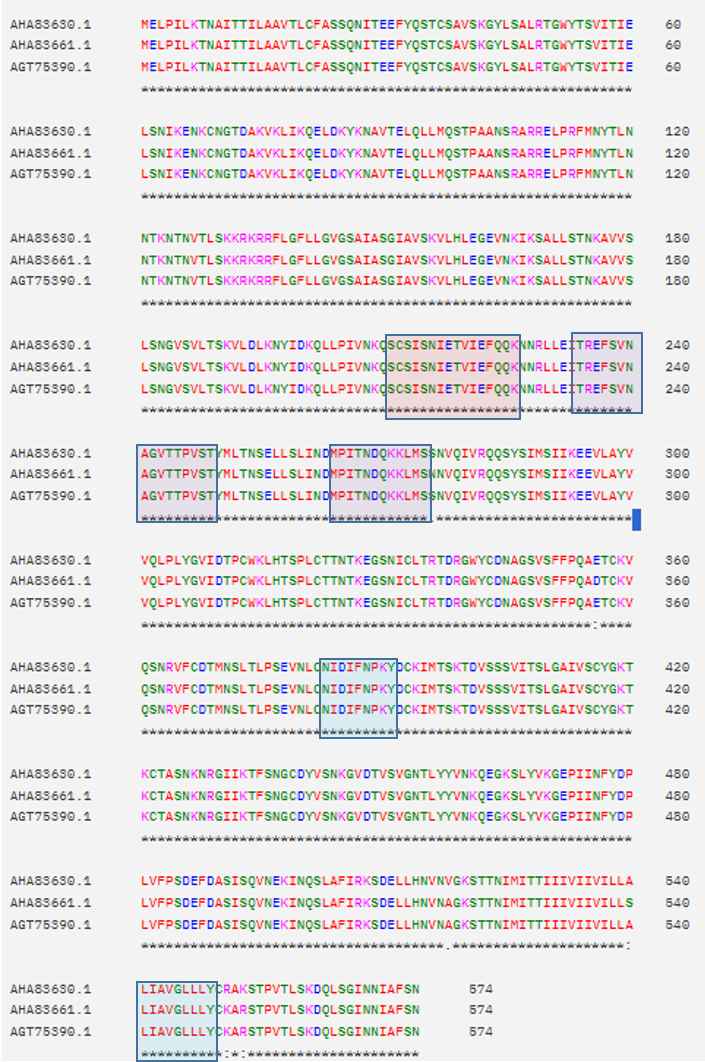
**

Figure S2: Shows the CTL, HTL and BCL epitopes in RSV

**
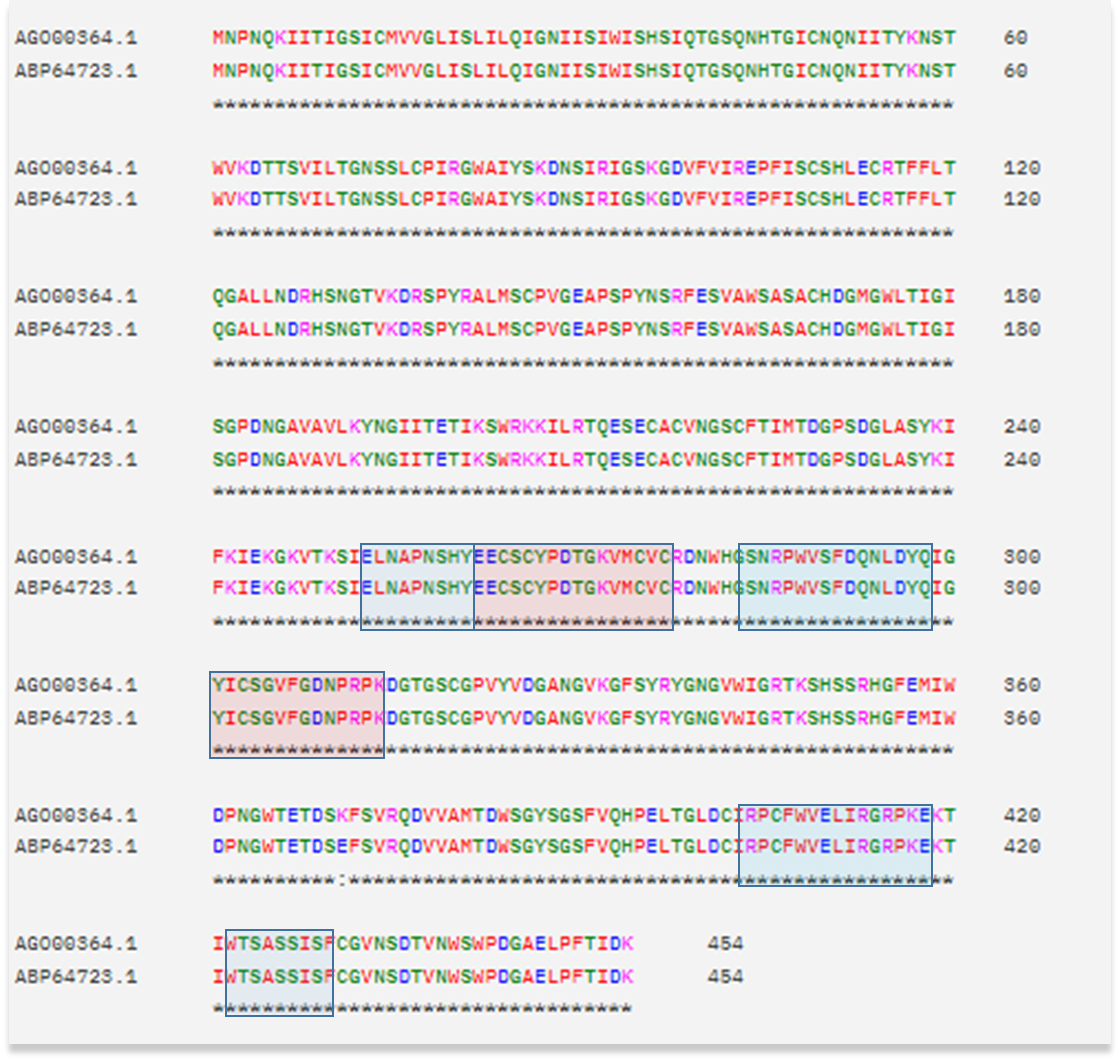
**

Figure S3: Shows the CTL, HTL and BCL epitopes in influenza A virus


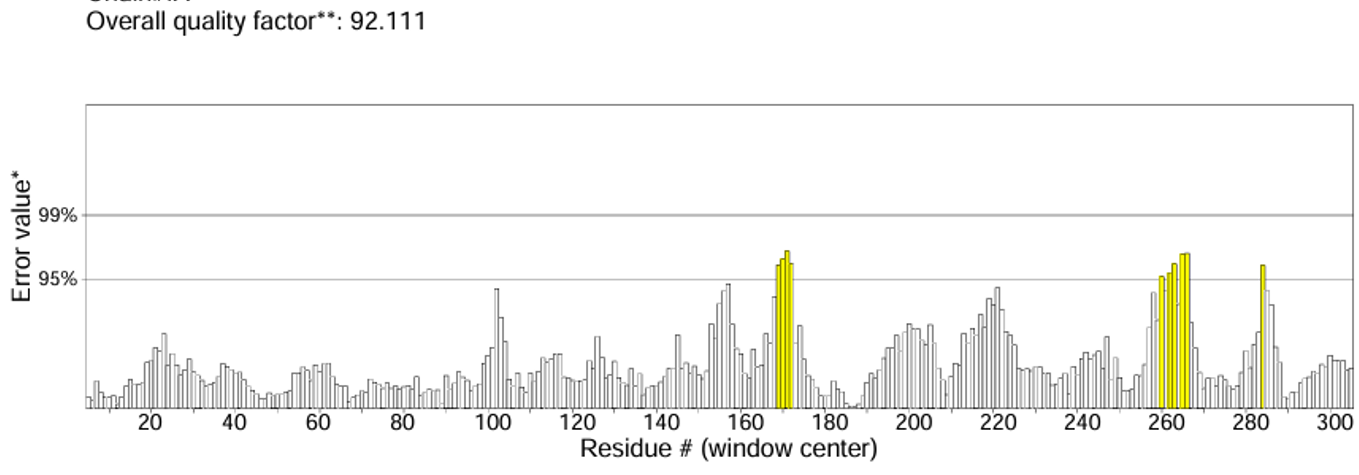


Figure S4: shows overall quality of the construct

**Table S1:** Different protein from hMPV, RSV and influenza A virus.

| **Virus** | **Protein** | **Antigenic value** | **Antigenicity** |
| --- | --- | --- | --- |
| **Human Metapneumovirus (hMPV)** | N | 0.5243 | Antigenic |
| P | 0.5131 | Antigenic |
| M | 0.3939 | Non- Antigenic |
| F | 0.4775 | Antigenic |
| M2-1 | 0.4212 | Antigenic |
| M2-2S | 0.4285 | Antigenic |
| SH | 0.3756 | Non- Antigenic |
| G | 0.6768 | Antigenic |
| L | 0.471 | Antigenic |
| **Respiratory syncytial virus (RSV)** | NS1 | 0.3602 | Non- Antigenic |
| NS2 | 0.5592 | Antigenic |
| N | 0.4307 | Antigenic |
| P | 0.5066 | Antigenic |
| M | 0.5250 | Antigenic |
| SH | 0.6297 | Antigenic |
| G | 0.4949 | Antigenic |
| F | 0.5219 | Antigenic |
| M2 | 0.4669 | Antigenic |
| L | 0.4440 | Antigenic |
| **Influenza A Virus** | PB1 | 0.4910 | Antigenic |
| PA | 0.5121 | Antigenic |
| hemagglutinin | 0.5471 | Antigenic |
| PB2 | 0.7418 | Antigenic |
| nucleocapsid protein | 0.6080 | Antigenic |
| matrix protein 2 | 0.4644 | Antigenic |
| hemagglutinin | 0.4466 | Non- Antigenic |
| neuraminidase | 0.5024 | Antigenic |
| matrix protein 2 | 0.6037 | Antigenic |
| nuclear export protein | 0.4252 | Antigenic |
| nonstructural protein 1 | 0.3328 | Non- Antigenic |
| matrix protein 1 | 0.4828 | Antigenic |
| nucleocapsid protein | 0.7694 | Antigenic |
| nonstructural protein 1 | 0.3611 | Non- Antigenic |

**Table S2.** Predicted HTL epitopes. The table shows the specific allele against which the HTL epitopes are predicted. Furthermore, it also shows the methods and percentile rank of each peptide. The HTL epitopes shown in bold are finally selected epitopes for chimeric multi-epitopes vaccine constructed.

| **Virus** | **Protein** | **Allele** | **Start** | **End** | **Peptide Sequence** | **Percentile**  **Rank** | **Antigenicity**  **Score** |
| --- | --- | --- | --- | --- | --- | --- | --- |
| **Human Metapneumovirus** | Fusion protein | HLA-DRB1*07:01 | 229 | 243 | RAVSYMPTSAGQIKL | 0.06 | 0.8830 |
| HLA-DRB1*15:01 | 119 | 133 | TAGIAIAKTIRLESE | 0.12 | 0.8439 |
| HLA-DRB5*01:01 | 131 | 145 | ESEVNAIKGALKTTN | 0.13 | 0.4978 |
| HLA-DRB1*15:01 | 162 | 176 | VRELKEFVSKNLTSA | 0.13 | -0.0826 |
| HLA-DRB4*01:01 | 63 | 77 | GPSLIKTELDLTKSA | 0.18 | 0.5887 |
| HLA-DRB1*03:01 | 415 | 429 | ADTVTIDNTVYQLSK | 0.26 | 0.0778 |
| HLA-DRB1*03:01 | 218 | 232 | SLDLMNDAELARAVS | 0.26 | 0.4532 |
| HLA-DRB4*01:01 | 200 | 214 | FLNVVRQFSDNAGIT | 0.30 | 0.0926 |
| HLA-DRB5*01:01 | 152 | 166 | GNGVRVLATAVRELK | 0.33 | 0.3485 |
| HLA-DRB1*07:01 | 231 | 245 | VSYMPTSAGQIKLML | 0.60 | 0.5663 |
| **Respiratory syncytial virus** | Fusion protein | HLA-DRB3*02:02 | 234 | 248 | TREFSVNAGVTTPVS | 0.04 | 0.2788 |
| HLA-DRB1*03:01 | 263 | 277 | DMPITNDQKKLMSN | 0.04 | 0.2076 |
| HLA-DRB3*02:02 | 238 | 252 | GCDYVSNKGVDTVSV | 0.11 | 0.6006 |
| HLA-DRB3*02:02 | 270 | 284 | QKKLMSNNVQIVRQQ | 0.12 | 0.2284 |
| HLA-DRB1*15:01 | 80 | 94 | KQELDKYKSAVTELQ | 0.13 | -0.2571 |
| HLA-DRB4*01:01 | 75 | 89 | KVKLIKQELDKYKSA | 0.16 | -0.7015 |
| HLA-DRB3*02:02 | 269 | 283 | DQKKLMSNNVQIVRQ | 0.16 | 0.0835 |
| HLA-DRB4*01:01 | 392 | 406 | DCKIMTSKTDVSSSV | 0.23 | 0.1144 |
| HLA-DRB1*15:01 | 472 | 486 | EPIINFYDPLVFPSD | 0.29 | -0.0213 |
| HLA-DRB3*02:02 | 436 | 450 | SNGCDYVSNKGVDTV | 0.32 | 0.3386 |
| **Influenza A Virus** | neuraminidase | HLA-DRB1*15:01 | 162 | 176 | SDGLASYKIFKIEKG | 0.04 | 0.1598 |
| HLA-DRB3*01:01 | 12 | 26 | WAIYSKDNSIRIGSK | 0.10 | 1.1726 |
| HLA-DRB3*01:01 | 249 | 263 | SCGPVYVDGANGVKG | 0.17 | 0.2163 |
| HLA-DRB3*02:02 | 178 | 192 | VTKSIELNAPNSHYE | 0.28 | 0.3843 |
| HLA-DRB1*15:01 | 116 | 130 | GAVAVLKYNGIITET | 0.41 | 0.4093 |
| HLA-DRB3*02:02 | 180 | 194 | KSIELNAPNSHYEEC | 0.66 | 0.1576 |
| HLA-DRB3*01:01 | 216 | 230 | RPWVSFDQNLDYQIG | 0.78 | 0.6706 |
| HLA-DRB1*07:01 | 44 | 58 | CRTFFLTQGALLNDR | 0.90 | 0.4648 |
| HLA-DRB1*07:01 | 119 | 133 | AVLKYNGIITETIKS | 1.20 | 0.1688 |
| HLA-DRB3*01:01 | 214 | 228 | SNRPWVSFDQNLDYQ | 1.30 | 0.6043 |
| HLA-DRB5*01:01 | 334 | 348 | RPCFWVELIRGRPKE | 2.20 | 0.9819 |

**Table S3.** Predicted HTL epitopes. The table shows the specific allele against which the HTL epitopes are predicted. Furthermore, it also shows the methods and percentile rank of each peptide. The HTL epitopes shown in bold are finally selected epitopes for chimeric multi-epitopes vaccine constructed.

| **Virus** | **Protein** | **Allele** | **Start** | **End** | **Peptide Sequence** | **Percentile**  **Rank** | **Antigenicity**  **Score** |
| --- | --- | --- | --- | --- | --- | --- | --- |
| **Human Metapneumovirus** | Fusion protein | HLA-DRB1*07:01 | 229 | 243 | RAVSYMPTSAGQIKL | 0.06 | 0.8830 |
| HLA-DRB1*15:01 | 119 | 133 | TAGIAIAKTIRLESE | 0.12 | 0.8439 |
| HLA-DRB5*01:01 | 131 | 145 | ESEVNAIKGALKTTN | 0.13 | 0.4978 |
| HLA-DRB1*15:01 | 162 | 176 | VRELKEFVSKNLTSA | 0.13 | -0.0826 |
| HLA-DRB4*01:01 | 63 | 77 | GPSLIKTELDLTKSA | 0.18 | 0.5887 |
| HLA-DRB1*03:01 | 415 | 429 | ADTVTIDNTVYQLSK | 0.26 | 0.0778 |
| HLA-DRB1*03:01 | 218 | 232 | SLDLMNDAELARAVS | 0.26 | 0.4532 |
| HLA-DRB4*01:01 | 200 | 214 | FLNVVRQFSDNAGIT | 0.30 | 0.0926 |
| HLA-DRB5*01:01 | 152 | 166 | GNGVRVLATAVRELK | 0.33 | 0.3485 |
| HLA-DRB1*07:01 | 231 | 245 | VSYMPTSAGQIKLML | 0.60 | 0.5663 |
| **Respiratory syncytial virus** | Fusion protein | HLA-DRB3*02:02 | 234 | 248 | TREFSVNAGVTTPVS | 0.04 | 0.2788 |
| HLA-DRB1*03:01 | 263 | 277 | DMPITNDQKKLMSN | 0.04 | 0.2076 |
| HLA-DRB3*02:02 | 238 | 252 | GCDYVSNKGVDTVSV | 0.11 | 0.6006 |
| HLA-DRB3*02:02 | 270 | 284 | QKKLMSNNVQIVRQQ | 0.12 | 0.2284 |
| HLA-DRB1*15:01 | 80 | 94 | KQELDKYKSAVTELQ | 0.13 | -0.2571 |
| HLA-DRB4*01:01 | 75 | 89 | KVKLIKQELDKYKSA | 0.16 | -0.7015 |
| HLA-DRB3*02:02 | 269 | 283 | DQKKLMSNNVQIVRQ | 0.16 | 0.0835 |
| HLA-DRB4*01:01 | 392 | 406 | DCKIMTSKTDVSSSV | 0.23 | 0.1144 |
| HLA-DRB1*15:01 | 472 | 486 | EPIINFYDPLVFPSD | 0.29 | -0.0213 |
| HLA-DRB3*02:02 | 436 | 450 | SNGCDYVSNKGVDTV | 0.32 | 0.3386 |
| **Influenza A Virus** | Neuraminidase | HLA-DRB1*15:01 | 162 | 176 | SDGLASYKIFKIEKG | 0.04 | 0.1598 |
| HLA-DRB3*01:01 | 12 | 26 | WAIYSKDNSIRIGSK | 0.10 | 1.1726 |
| HLA-DRB3*01:01 | 249 | 263 | SCGPVYVDGANGVKG | 0.17 | 0.2163 |
| HLA-DRB3*02:02 | 178 | 192 | VTKSIELNAPNSHYE | 0.28 | 0.3843 |
| HLA-DRB1*15:01 | 116 | 130 | GAVAVLKYNGIITET | 0.41 | 0.4093 |
| HLA-DRB3*02:02 | 180 | 194 | KSIELNAPNSHYEEC | 0.66 | 0.1576 |
| HLA-DRB3*01:01 | 216 | 230 | RPWVSFDQNLDYQIG | 0.78 | 0.6706 |
| HLA-DRB1*07:01 | 44 | 58 | CRTFFLTQGALLNDR | 0.90 | 0.4648 |
| HLA-DRB1*07:01 | 119 | 133 | AVLKYNGIITETIKS | 1.20 | 0.1688 |
| HLA-DRB3*01:01 | 214 | 228 | SNRPWVSFDQNLDYQ | 1.30 | 0.6043 |
| HLA-DRB5*01:01 | 334 | 348 | RPCFWVELIRGRPKE | 2.20 | 0.9819 |

**Table S4.** Predicted linear B-Cell epitopes for the virus polypeptide. The predicted score for each peptide is given against each B-cell epitope.

| **Virus** | **Protein** | **Start Position** | **Epitope** | **Score** | **Antigenicity Score** |
| --- | --- | --- | --- | --- | --- |
| **Human Metapneumovirus** | Fusion protein | 510 | IIIIIKKTRKPAGAPP | 0.92 | 1.0870 |
| 283 | CWIIKAAPSCSEKDGN | 0.92 | 0.8104 |
| 301 | CLLREDQGWYCKNAGS | 0.89 | 0.5101 |
| 238 | AGQIKLMLENRAMVRR | 0.89 | 0.0882 |
| 92 | EEQIENPRQSRFVLGA | 0.88 | 0.2275 |
| 434 | QHVIKGRPVSNSFDPI | 0.88 | 0.9931 |
| 363 | VSTGRHPISMVALSPL | 0.87 | 0.9390 |
| 312 | KNAGSTVYYPNEKDCE | 0.87 | 0.4609 |
| 125 | AKTIRLESEVNAIKGA | 0.87 | 0.3283 |
| 409 | YITNQDADTVTIDNTV | 0.86 | 0.3534 |
| **Respiratory syncytial virus** | Fusion protein | 479 | DPLVFPSDEFDASISQ | 0.92 | 0.0842 |
| 106 | RARRELPRFMNYTLNN | 0.92 | -0.0128 |
| 306 | YGVIDTPCWKLHTSPL | 0.91 | 0.5064 |
| 383 | NIDIFNPKYDCKIMTS | 0.89 | 0.7806 |
| 334 | TFSNGCDYVSNKGVDT | 0.88 | 0.3822 |
| 329 | GSNICLTRTDRGWYCD | 0.87 | 0.8391 |
| 23 | ASSQNITEEFYQTTCS | 0.86 | 0.2400 |
| 211 | SCSISNIETVIEFQQK | 0.86 | 1.0332 |
| 196 | KNYIDKQLLPIVNKQS | 0.86 | 0.3791 |
| 54 | TSVITIELSNIKENKCd | 0.86 | 0.6166 |
| **Influenza A Virus** | neuraminidase | 223 | CFTIMTDGPSDGLASY | 0.94 | -0.2483 |
| 315 | DGTGSCGPVYVDGANG | 0.93 | -0.1810 |
| 282 | HGSNRPWVSFDQNLDY | 0.93 | 0.2757 |
| 356 | FEMIWDPNGWTETDSK | 0.92 | 0.1997 |
| 35 | SHSIQTGSQNHTGICN | 0.92 | 0.6373 |
| 299 | IGYICSGVFGDNPRPK | 0.91 | 0.5897 |
| 273 | VMCVCRDNWHGSNRPW | 0.91 | 0.1602 |
| 261 | EECSCYPDTGKVMCVC | 0.91 | 0.4128 |
| 329 | NGVKGFSYRYGNGVWI | 0.90 | 0.3707 |
| 131 | NGTVKDRSPYRALMSC | 0.89 | 0.6479 |
| 251 | SIELNAPNSHYEECSC | 0.88 | 0.2283 |

**Table S5**. Key Hydrogen Bonds Between TLR4 and Vaccine Construct During MD Simulation.

| **TLR4 Residues** | **Vaccine Residues** | **Frames Observed** | **Bond Life** | **Average Distance (Å)** | **Standard Deviation (Å)** |
| --- | --- | --- | --- | --- | --- |
| 459-ND2 | 876-O | 6261 | 62.60% | 2.82 | 0.09 |
| 357-O | 855-NH1 | 3808 | 38.10% | 2.84 | 0.09 |
| 458-OE1 | 875-NZ | 3486 | 34.90% | 2.82 | 0.10 |
| 412-OE1 | 817-NH1 | 2851 | 28.50% | 2.80 | 0.09 |
| 455-OG | 877-OD1 | 2221 | 22.20% | 2.77 | 0.13 |
| 409-OE1 | 817-NH1 | 2027 | 20.30% | 2.81 | 0.09 |
| 433-NH2 | 877-OD1 | 457 | 4.57% | 2.86 | 0.10 |
| 455-CB | 877-OD1 | 204 | 2.04% | 2.94 | 0.05 |
| 433-NH2 | 876-OD2 | 173 | 1.73% | 2.81 | 0.10 |
| 433-NH1 | 876-OD2 | 167 | 1.67% | 2.84 | 0.09 |
| 361-NZ | 834-O | 160 | 1.60% | 2.81 | 0.10 |
